# Supplementary material for: IGF-1R/epithelial-to-mesenchymal transition (EMT) crosstalk suppresses the erlotinib-sensitizing effect of EGFR exon 19 deletion mutations
Source: Springer Nature journal article supplement (doi:10.1038/srep02560), 2013-09-02
Supplement: 41598_2013_BFsrep02560_MOESM1_ESM.pdf [file 41598_2013_BFsrep02560_MOESM1_ESM.pdf]

**IGF-1R/epithelial-to-mesenchymal transition (EMT) crosstalk suppresses the Erlotinib-sensitizing effect of *EGFR* exon 19 deletion mutations**

Sílvia Cufí<sup>1,2a</sup>  
Cristina Oliveras-Ferraro<sup>1,2a</sup>  
Alejandro Vazquez-Martin<sup>1,2a</sup>  
Violeta Zenobia Torres-García<sup>1,2</sup>  
Bruna Corominas-Faja<sup>1,2</sup>  
Elisabet Cuyàs<sup>1,2</sup>  
Rosa Bonavia<sup>3</sup>  
Joana Visa<sup>3</sup>  
Begoña Martín-Castillo<sup>2,4</sup>  
Enrique Barrajón-Catalán<sup>5,6</sup>  
Vicente Micol<sup>5,6</sup>  
Joaquim Bosch-Barrera<sup>2,7</sup>  
Javier A. Menéndez<sup>1,2\*</sup>

<sup>1</sup>Metabolism & Cancer Group, Translational Research Laboratory,  
Catalan Institute of Oncology, Girona, Catalonia (SPAIN)=

<sup>2</sup>Girona Biomedical Research Institute (IDIBGi), Girona, Catalonia, Spain

<sup>3</sup>Animal Care Facility, IDIBELL,

L'Hospitalet de Llobregat, Barcelona, Catalonia, Spain

<sup>4</sup>Unit of Clinical Research, Catalan Institute of Oncology, Girona, Catalonia, Spain

<sup>5</sup>Molecular and Cellular Biology Institute (IBMC),

Miguel Hernández University, Elche, Alicante, Spain,

<sup>6</sup>Monteloeder, Inc., Elche, Alicante, Spain,

<sup>7</sup>Medical Oncology, Catalan Institute of Oncology, Girona, Catalonia, Spain.

<sup>a</sup> These authors contributed equally to this research

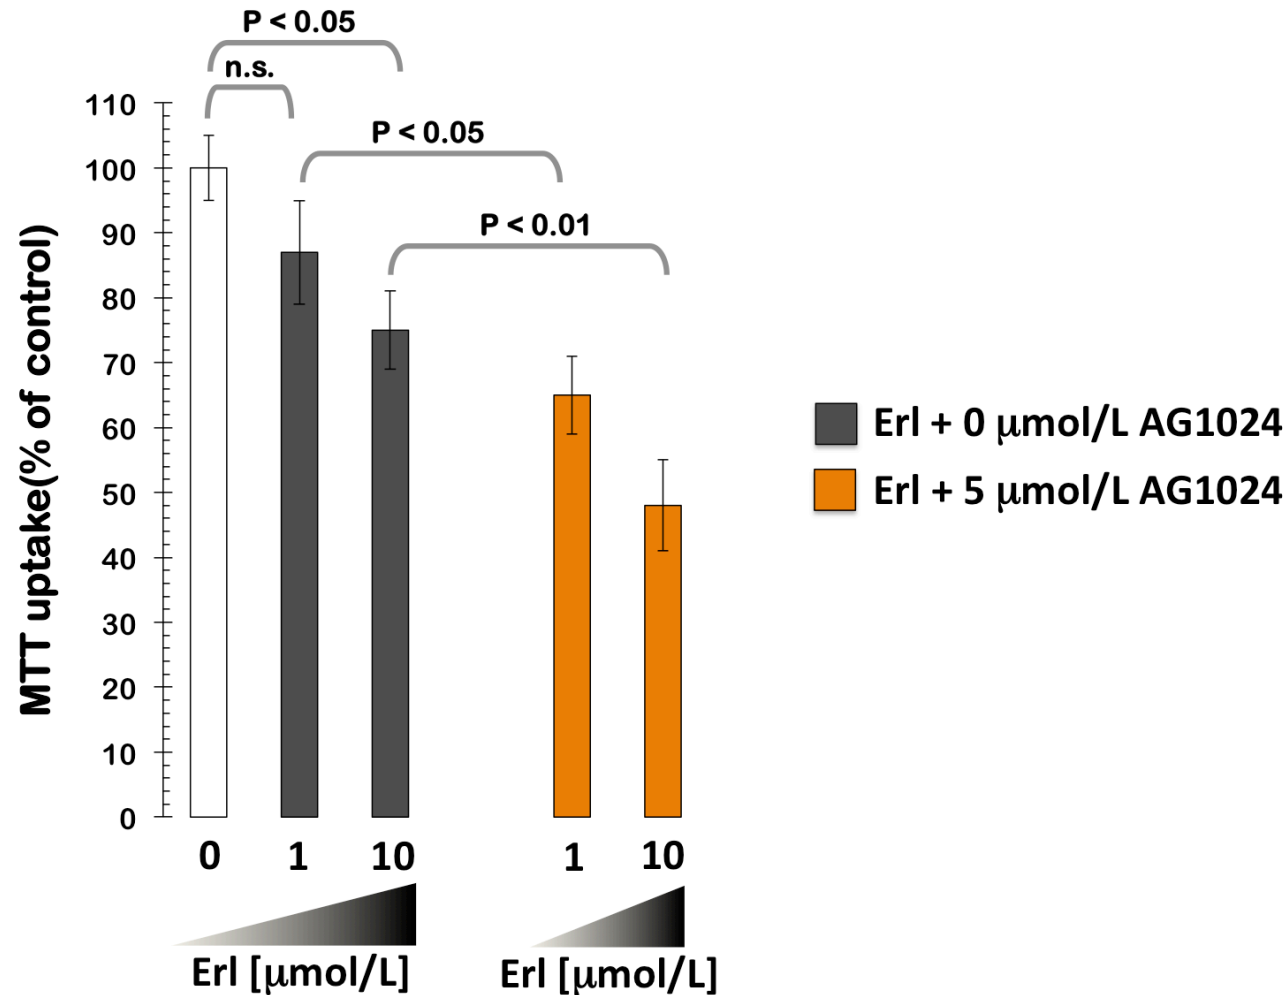

**Supplementary Figure 1 Pharmacological inhibition of IGF-1R circumvents EMT-induced Resistance to erlotinib.** The effects of concurrent treatment with the EMT inducer TGFβ1 on cell viability of PC-9 cells exposed to erlotinib in the absence or presence of AG1024 were measured by MTT uptake assays as specified. Figure shows dose-response graphs as % of untreated cell populations (untreated control cells=100% cell viability). Results are means (*columns*) and 95% confidence intervals (*bars*) of three independent experiments made in triplicate. Statistically significant differences (one-factor ANOVA analysis) between MTT uptakes in treated and untreated control cells are shown. Statistical tests were two-sided.

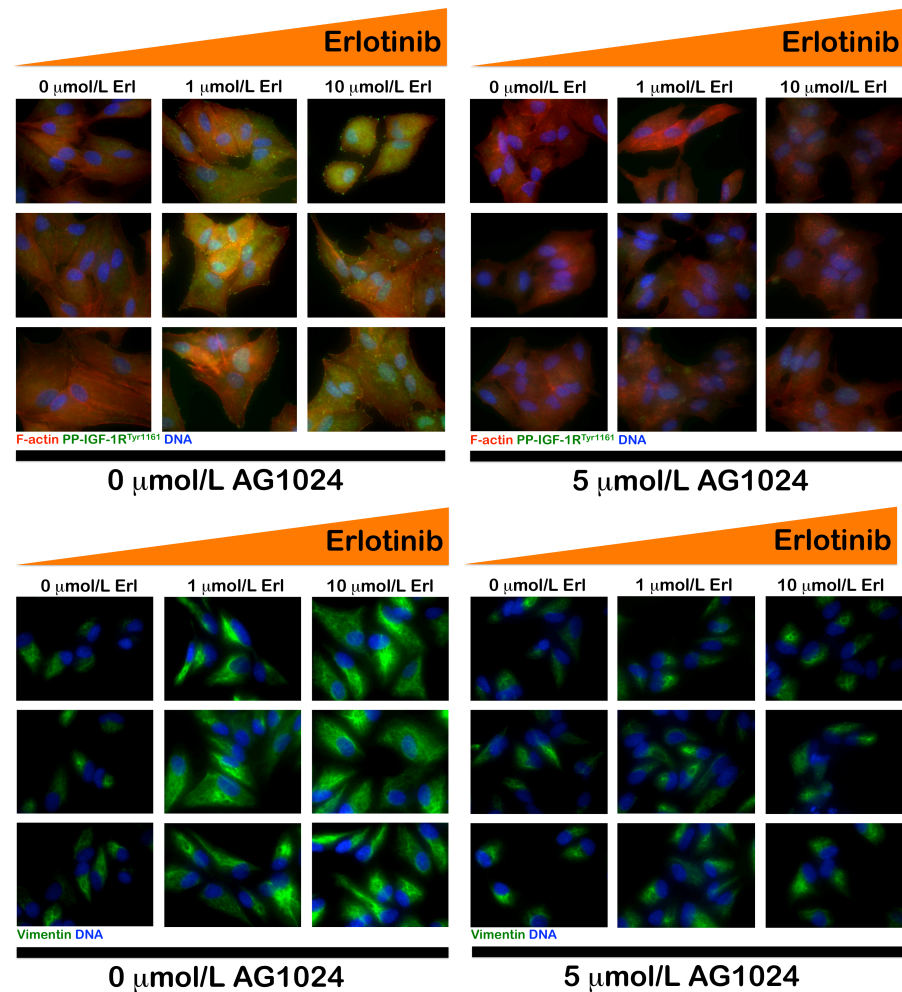

Supplementary Figure 2 **Pharmacological inhibition of IGF-1R activity impedes erlotinib-induced mesenchymal features in PC-9 cells.** PC-9 cells were grown until 75%-80% confluence, serum-starved for 24 h, and then treated for 72 h with graded concentrations of erlotinib (0 and 10 μmol/L) in the absence or presence of 5 μmol/L AG1024. *Top panels.* After fixation and permeabilization, cellular co-distribution of PP-IGF-1R<sup>Tyr1161</sup> and F-actin was assessed following staining with anti-PP-IGF-1R<sup>Tyr1161</sup> and anti-F-actin antibodies, as specified, and Hoechst 33258 for nuclear counterstaining. *Bottom panels.* After fixation and permeabilization, sub-cellular distribution of the mesenchymal-specific marker vimentin was assessed following staining with an anti-vimentin antibody and Hoechst 33258 for nuclear counterstaining. Images show representative portions of untreated-, erlotinib-, AG1024-, or erlotinib + AG1024-treated PC-9 cells captured in different channels for PP-IGF-1R<sup>Tyr1161</sup> (green), F-actin (red), vimentin (green), and Hoechst 33258 (blue) with a 20x objective, and merged on BD Pathway 855 Bioimager System using BD Attovision software.
